# Supplementary material for: Gαi2-induced conductin/axin2 condensates inhibit Wnt/β-catenin signaling and suppress cancer growth
Source: PubMed Central journal article supplement (PMC8814139; doi:10.1038/s41467-022-28286-9), 2022-02-03
Supplement: 41467_2022_28286_MOESM3_ESM.pdf [file 41467_2022_28286_MOESM3_ESM.pdf]

## **Description of Additional Supplementary Files**

File Name: Supplementary Movie 1

Description: Live Monitoring of GBZ-induced formation of conductin condensates. Time-laps microscopy of GFP fluorescence in U2OS cells stably expressing GFP-tagged conductin for 96 minutes after treatment start with 100  $\mu$ M GBZ.
